# Supplementary figures and images for: Aroplectrus dimerus (Hymenoptera: Eulophidae), Ectoparasitoid of the Nettle Caterpillar, Oxyplax pallivitta (Lepidoptera: Limacodidae): Evaluation in the Hawaiian Islands
Source: MDPI journal article supplement (doi:10.3390/life14040509), 2024-04-15

# Aroplectrus eggs deposited per Darna larva

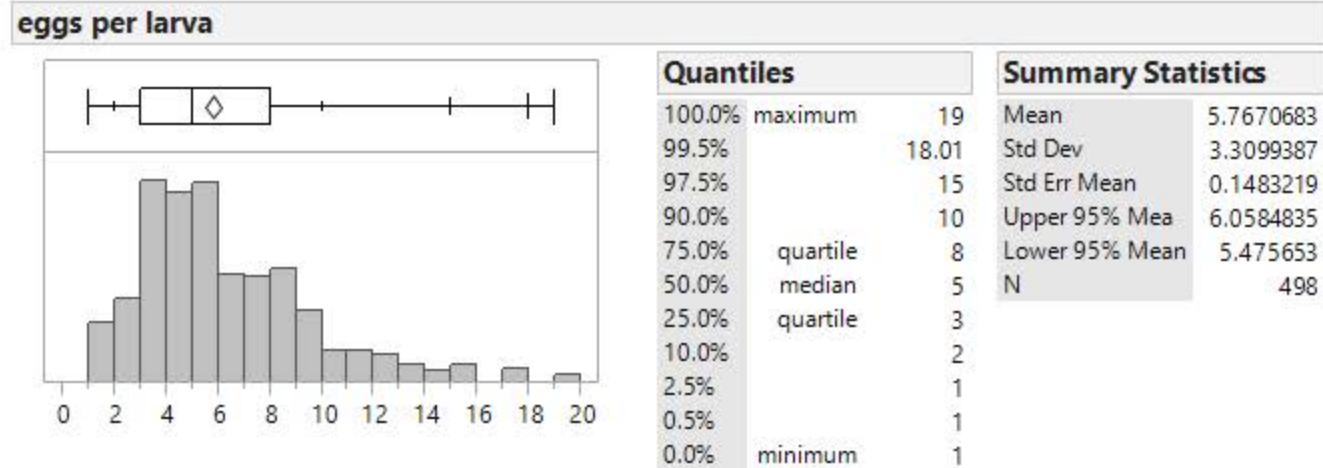

Supplement: s1 [file s1]
